# Supplementary material for: Tumor-derived exosomes promote the in vitro osteotropism of melanoma cells by activating the SDF-1/CXCR4/CXCR7 axis
Source: PubMed Central journal article supplement (PMC6642540; doi:10.1186/s12967-019-1982-4), 2019-07-19
Supplement: 12967_2019_1982_MOESM2_ESM.pdf [file 12967_2019_1982_MOESM2_ESM.pdf]

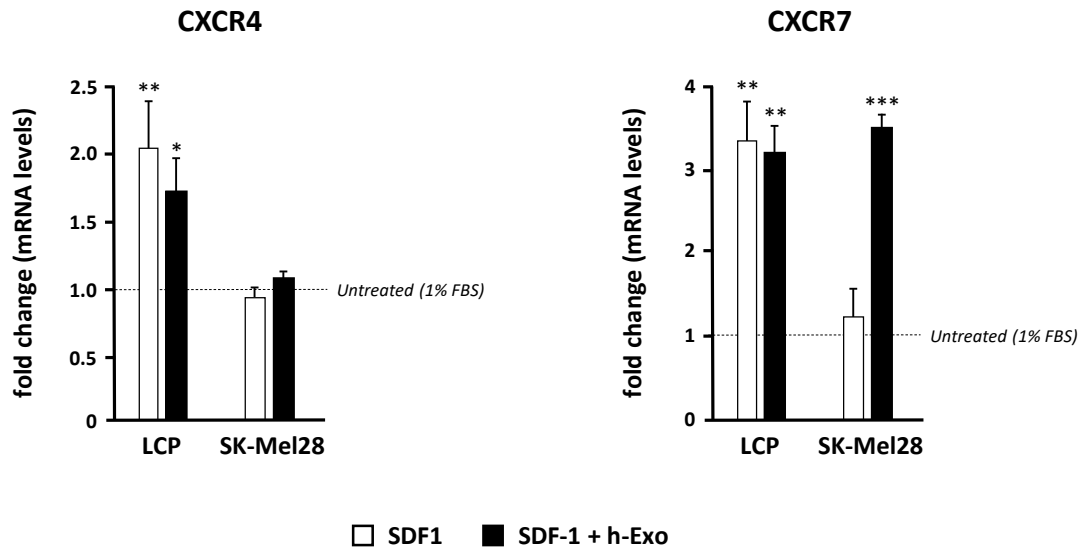

Figure S1
